# Supplementary material
Source: HighWire-hosted journal article supplement (https://sti.bmj.com/content/94/8/611)
Supplement: inline-supplementary-material-2 [file inline-supplementary-material-2.pdf]

Supplemental Figure 1. Sexually Transmitted Infection Rate Ratios by County in the Delta Region.

### Sexually Transmitted Infection Rate Ratios by County in the Delta Region

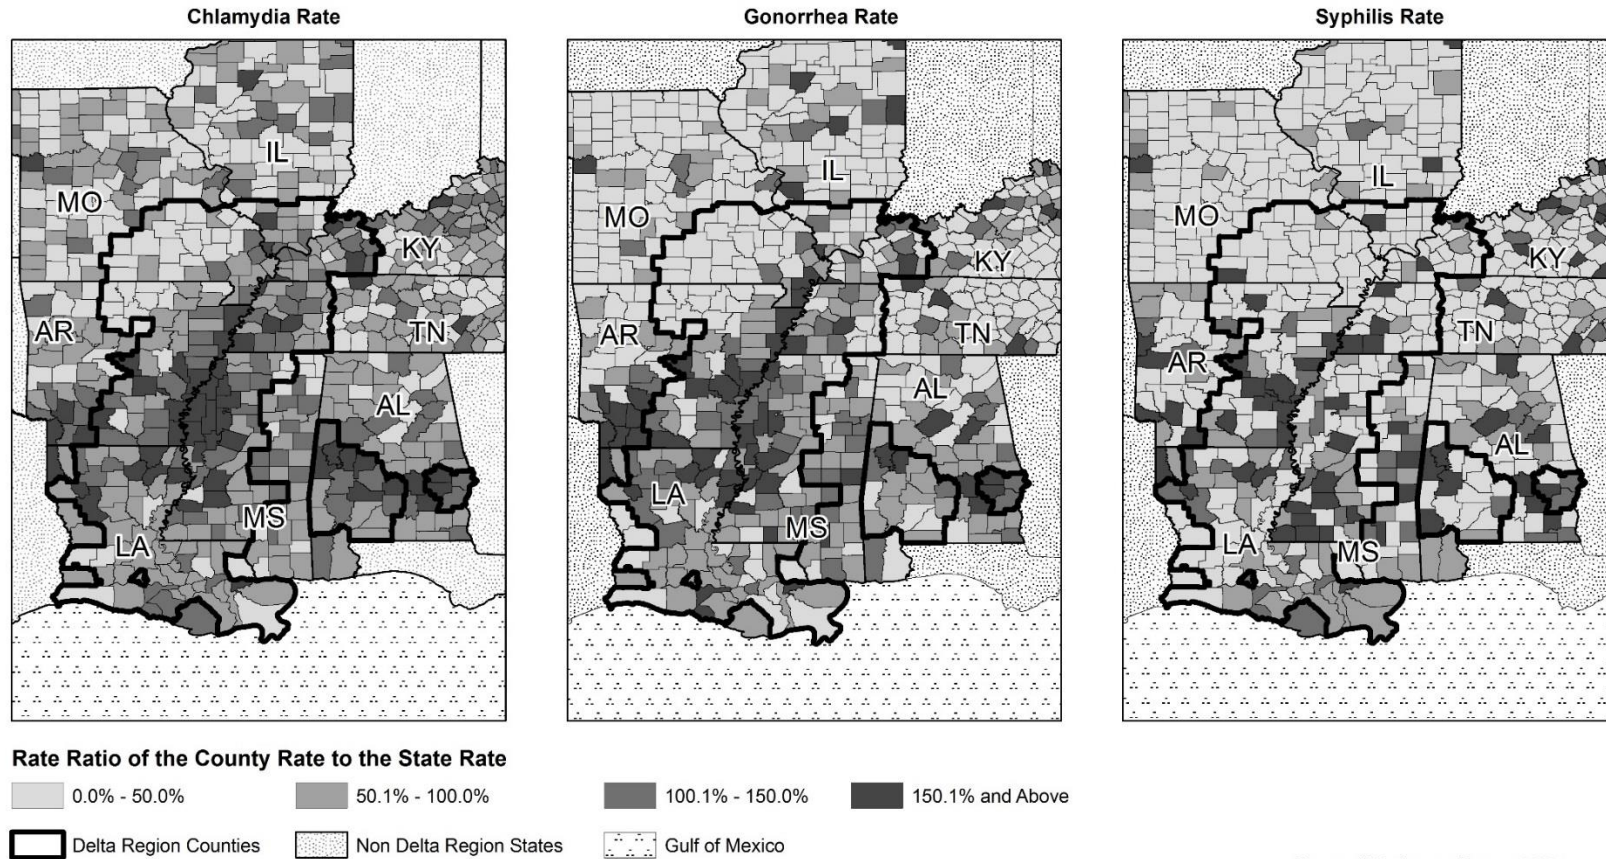

Source: U.S. Census Bureau 2010  
 Map created by: David Crumly 05/17/2018  
 Projection: GCS\_North\_American\_1983  
 Scale: 1:11,500,000
